# Supplementary material for: ExplaiNN: interpretable and transparent neural networks for genomics
Source: bioRxiv or medRxiv preprint supplement (doi:10.1101/2022.05.20.492818), 2022-11-13

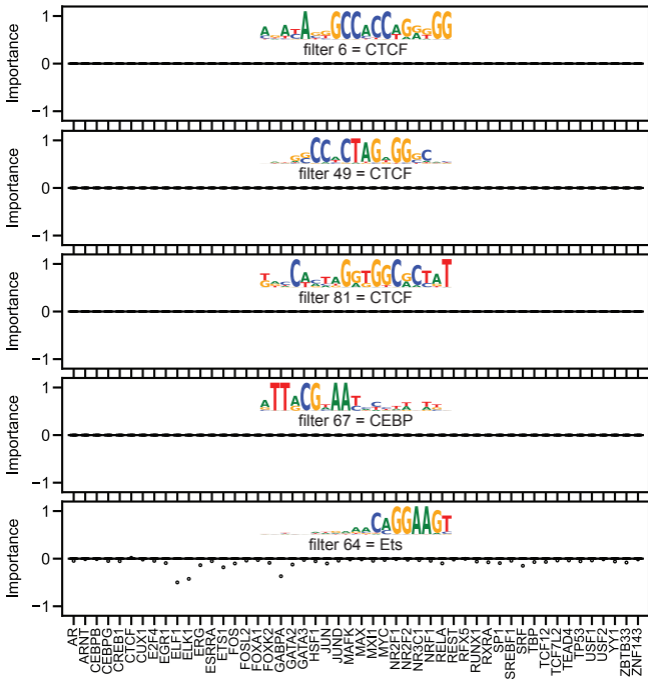

Supplement: Supplementary file [file media-1.pdf]
